# Supplementary material for: Piezocatalytic performance enhancement using the sandwich structure of a PVDF-HFP/graphene film
Source: Royal Society of Chemistry journal article supplement (doi:10.1039/d2ta08651d), 2023-01-01
Supplement: d2ta08651d1.pdf [file d2ta08651d1.pdf]

## Supporting Information

### **Piezocatalytic performance enhancement using the sandwich structure of PVDF–HFP/graphene film**

*Ya Liu, Wangshu Tong\*, Wanting Song, Tingting Cao, Yulun Liu, Lingchao Wang, Zhihao Wang, Yihe Zhang\**

Beijing Key Laboratory of Materials Utilization of Nonmetallic Minerals and Solid Wastes, National Laboratory of Mineral Materials, School of Materials Science and Technology, China University of Geosciences (Beijing), Beijing 100083, China

\*Correspondence author. E-mail: [tong@cugb.edu.cn](mailto:tong@cugb.edu.cn); [zyh@cugb.edu.cn](mailto:zyh@cugb.edu.cn).

**Preparation of porous films:** The rGO suspension drops were added to three glass slides ( $5 \times 5$  cm<sup>2</sup>), wherein the volumes of titrated rGO solution were  $0.05 \times 2$ ,  $0.10 \times 2$ ,  $0.15$  mL  $\times 2$ , respectively. After rGO dried completely,  $0.75$  mL  $\times 2$  PVDF–HFP solution was dropped into each rGO. The three weight percentages of 2.4, 4.7, and 6.9 wt% of rGO were obtained. When the rGO content exceeded 6.9 wt%, the excess rGO could not be loaded into PVDF–HFP.

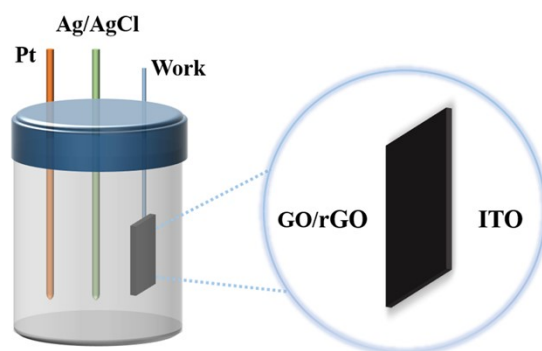

**Figure S1.** The schematic diagram of the electrochemical three-electrode system for GO and rGO.

**Table S1.** EIS fitting data for GO and rGO.

| Types of electrode | R1/ $\Omega$ | R2/ $\Omega$ |
|--------------------|--------------|--------------|
| GO                 | 2.395        | 24.17        |
| rGO                | 1.885        | 15.87        |

GO and rGO electrodes, inset shows equivalent circuit diagram. R1 is solution resistance; R2 is the total charge transfer resistance; Z is the impedance. The constant phase Angle element CPE1 is used instead of the ideal capacitor (**Figure 1c**).

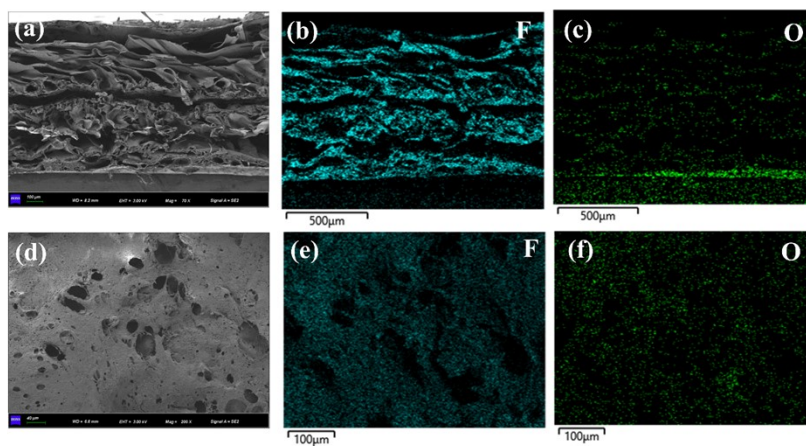

**Figure S2.** SEM and elemental color maps of (a–c) the PVDF–HFP@rGO porous sandwich film and (d–f) the PVDF–HFP/rGO porous composite film.

### Equations S1.

$$(1) \quad F(\beta) = A_{\beta} / (K_{\beta} / K_{\alpha}) A_{\alpha} + A_{\beta}$$

where  $A_{\beta}$  is the absorbance at  $840 \text{ cm}^{-1}$ , and  $A_{\alpha}$  is the absorbance at  $764 \text{ cm}^{-1}$ .  $K_{\beta}$  ( $7.7 \times 10^4 \text{ cm}^2 \text{ mol}^{-1}$ ) and  $K_{\alpha}$  ( $6.1 \times 10^4 \text{ cm}^2 \text{ mol}^{-1}$ ) are the absorption coefficients at  $840 \text{ cm}^{-1}$  and  $764 \text{ cm}^{-1}$ , respectively. The relative content of the  $\beta$  phase can be calculated from the equation above. The characteristic absorption peak of the  $\beta$  phase is about  $840 \text{ cm}^{-1}$ .

(2) For X-ray diffraction, the Bragg's Law:

$$2d \sin \theta = n\lambda$$

Where  $d$  is the distance between the crystal planes,  $\theta$  is the Angle between the incoming ray, the reflected ray and the reflected crystal plane,  $\lambda$  is the wavelength,  $n$  is the reflection order, Bragg equation is the necessary condition but not sufficient condition for X-ray diffraction in crystal.

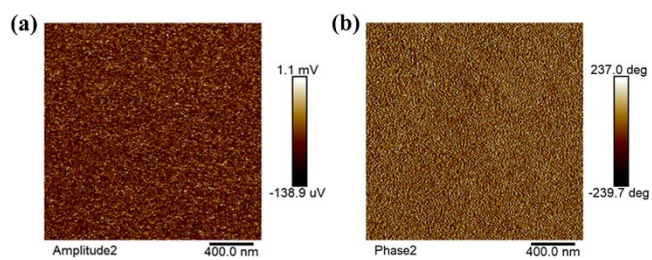

**Figure S3.** KPFM image of PVDF-HFP@rGO film, (a) amplitude image; (b) phase image.

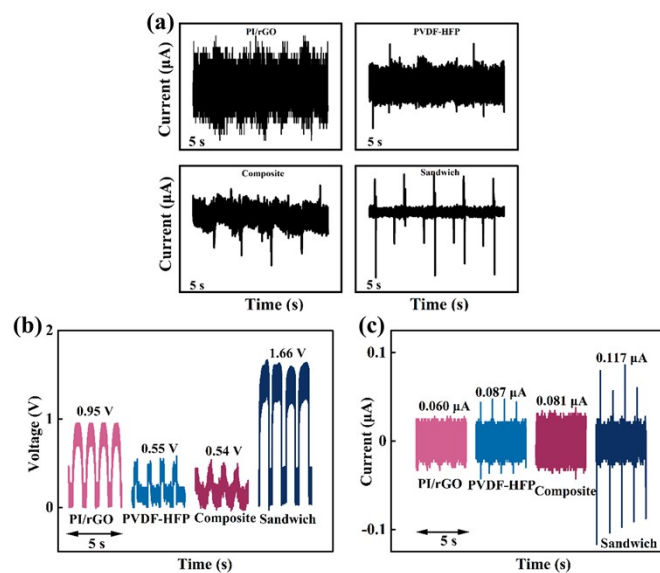

**Figure S4.** Piezoelectric signal (a) individual  $I_{SC}$  image. (b)  $V_{OC}$  and (c)  $I_{SC}$  with electrostatic shielding.

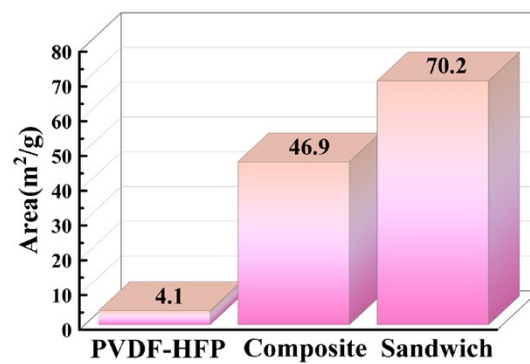

**Figure S5.** Comparison of the specific surface areas of PVDF–HFP, PVDF–HFP/rGO and PVDF–HFP@rGO samples.

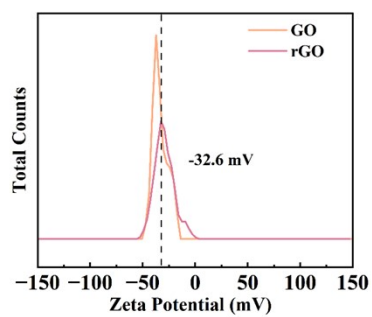

**Figure S6.** Zeta potential values of GO and rGO.

**Table S2.** Comparison of the degradation performances with different piezocatalysts.

| <b>Piezocatalysts</b>                       | <b>Methods</b>                                  | <b>Dye species</b> | <b>Dye volume and concentration</b> | <b>Degradation rate/%</b> | <b>Degradation time/h</b> | <b>Year Ref.</b>  |
|---------------------------------------------|-------------------------------------------------|--------------------|-------------------------------------|---------------------------|---------------------------|-------------------|
| <b>Fe<sub>2</sub>O<sub>3</sub>/PVDF–HFP</b> | Magnetic stirring (300 rpm min <sup>-1</sup> )  | TC                 | 20 mL, 50 mg/L                      | 53.7                      | 11                        | 2022 <sup>1</sup> |
| <b>HPVDF/BTO–OVs</b>                        | Propeller stirring (600 rpm min <sup>-1</sup> ) | BPA                | 50 mL, 5 mg/L                       | 33.0                      | 1                         | 2022 <sup>2</sup> |
| <b>H–ZnS@SNG</b>                            | Magnetic stirring (600 rpm min <sup>-1</sup> )  | MB                 | 20 mL, 20 mg/L                      | 88.7                      | 2                         | 2021 <sup>3</sup> |
| <b>PVDF–HFP@rGO</b>                         | Magnetic stirring (600 rpm min <sup>-1</sup> )  | MB                 | 20 mL, 10 mg/L                      | 98.0                      | 1                         | This work         |
| <b>BaTiO<sub>3</sub></b>                    | ultrasonic                                      | MB                 | 50 mL, 2 mg/L                       | 91.3                      | 2/3                       | 2022 <sup>4</sup> |
| <b>Ag@LiNbO<sub>3</sub>/PVDF</b>            | ultrasonic                                      | MB                 | 10 mL, 5 mg/L                       | 89.0                      | 2                         | 2021 <sup>5</sup> |
| <b>SnS<sub>2</sub>/CNFs</b>                 | ultrasonic                                      | BPA                | 10 mL, 10 mg/L                      | 100.0                     | 2                         | 2021 <sup>6</sup> |
| <b>OVHAP</b>                                | ultrasonic                                      | BPA                | 20 mL, 15 mg/L                      | 85.6                      | 1/2                       | 2022 <sup>7</sup> |

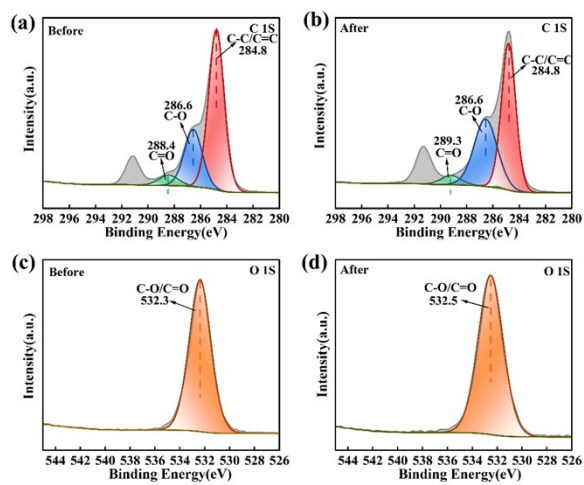

**Figure S7.** XPS survey spectrum of the PVDF-HFP@rGO: the change in the valence state before and after the reaction.

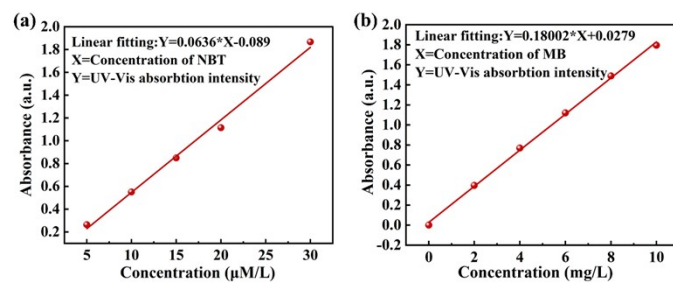

**Figure S8.** Standard curve of NBT and MB solution.

## References:

- 1 M. Chai, W. Tong, Z. Wang, Z. Chen, Y. An and Y. Zhang, *J. Hazard. Mater.*, 2022, **430**, 128446.
- 2 L. Wan, W. Tian, N. Li, D. Chen, Q. Xu, H. Li, J. He and J. Lu, *Nano Energy*, 2022, **94**, 106930.
- 3 M. Pan, S. Liu, B. Pan and J. W. Chew, *Nano Energy*, 2021, **88**, 106312.
- 4 Q. Tang, J. Wu, D. Kim, C. Franco, A. Terzopoulou, A. Veciana, J. Puigmartí-Luis, X. Z. Chen, B. J. Nelson and S. Pané, *Adv. Funct. Mater.*, , DOI:10.1002/adfm.202202180.
- 5 G. Singh, M. Sharma and R. Vaish, *ACS Appl. Mater. Interfaces*, 2021, **13**, 22914–22925.
- 6 W. Tian, J. Qiu, N. Li, D. Chen, Q. Xu, H. Li, J. He and J. Lu, *Nano Energy*, 2021, **86**, 106036.
- 7 Y. Miao, W. Tian, J. Han, N. Li, D. Chen, Q. Xu and J. Lu, *Nano Energy*, 2022, **100**, 107473.
